# Supplementary material for: Tumor-Infiltrating Immune-Related Long Non-Coding RNAs Indicate Prognoses and Response to PD-1 Blockade in Head and Neck Squamous Cell Carcinoma
Source: PubMed Central journal article supplement (PMC8562720; doi:10.3389/fimmu.2021.692079), 2021-10-19

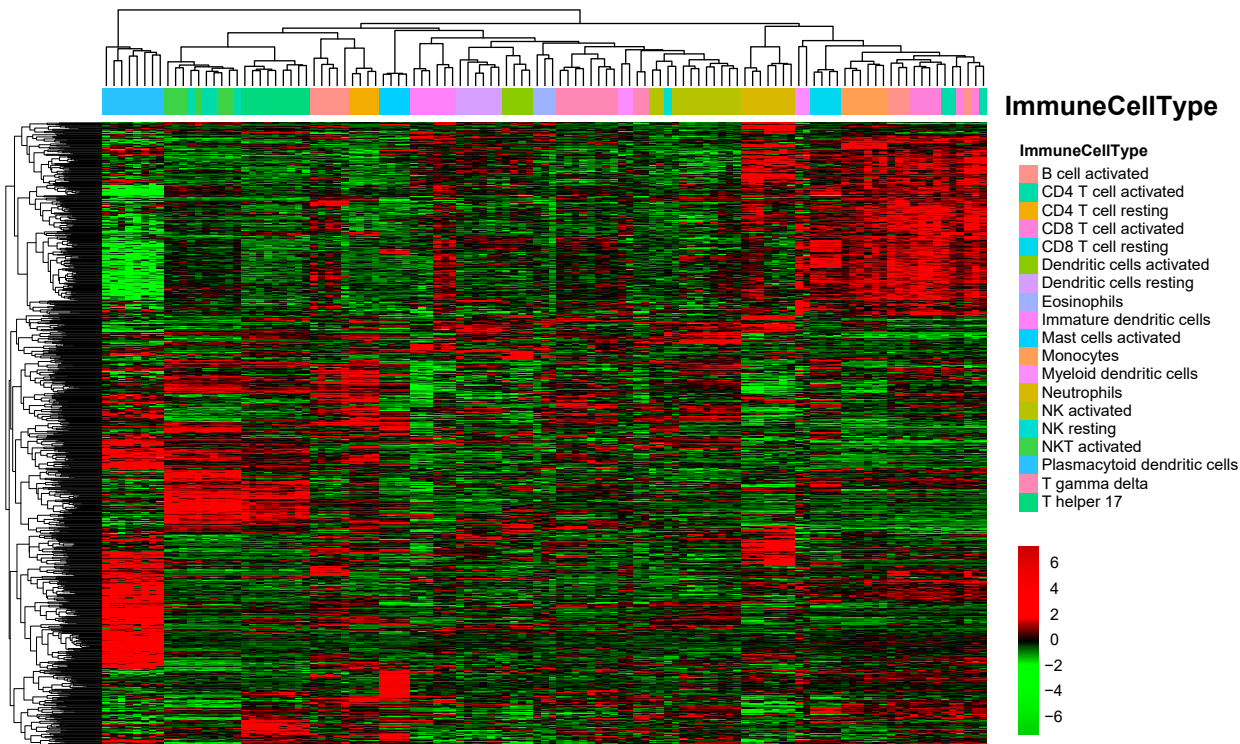

Supplement: DataSheet_1.pdf [file DataSheet_1.pdf]
