# Supplementary material for: Tumor-Infiltrating Immune-Related Long Non-Coding RNAs Indicate Prognoses and Response to PD-1 Blockade in Head and Neck Squamous Cell Carcinoma
Source: PubMed Central journal article supplement (PMC8562720; doi:10.3389/fimmu.2021.692079), 2021-10-19

TSPOAP1-AS1

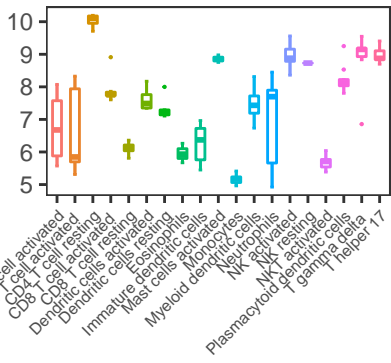

RASSF1-AS1

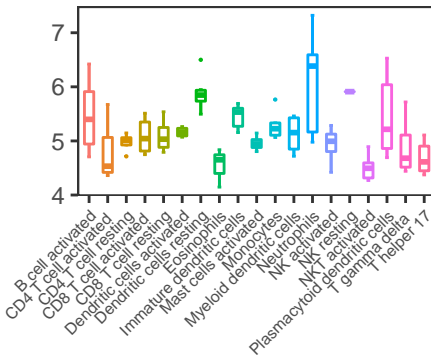

ENSG00000262089

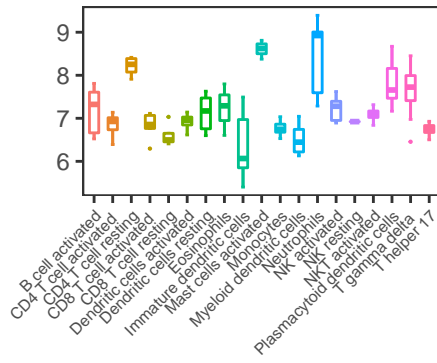

NDUFB2-AS1

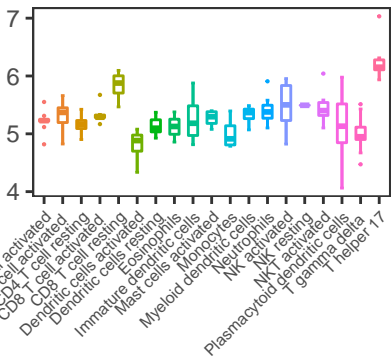

MIR124-1HG

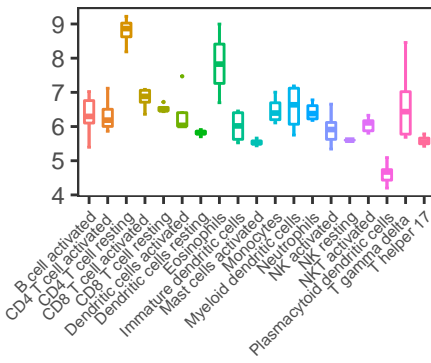

ENSG00000261888

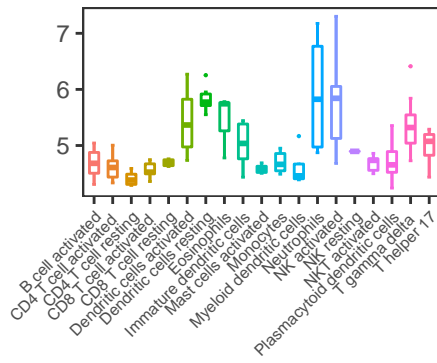

LINC01281

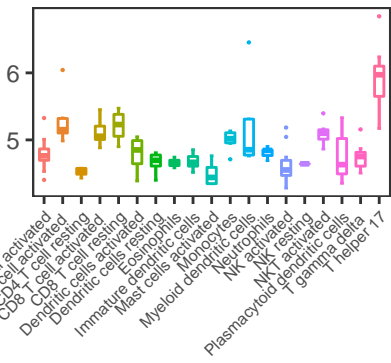

LCT-AS1

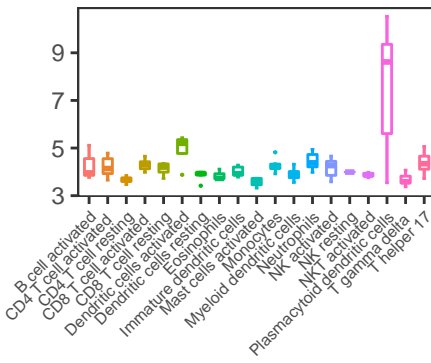

ENSG00000260244

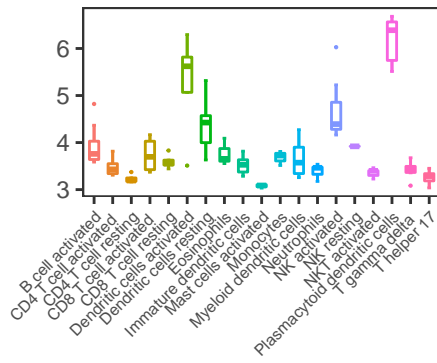

Supplement: DataSheet_2.pdf [file DataSheet_2.pdf]
